1 **Double-digest RAD sequencing outperforms microsatellite loci at assigning**  
2 **paternity and estimating relatedness: a proof of concept in a highly promiscuous**  
3 **bird**

4  
5 Derrick J. Thrasher<sup>3,4</sup>, Bronwyn G. Butcher<sup>1</sup>, Leonardo Campagna<sup>1,2</sup>, Michael S.  
6 Webster<sup>3,4</sup>, Irby J. Lovette<sup>1,2</sup>  
7

8  
9 <sup>1</sup>Fuller Evolutionary Biology Program, Cornell Laboratory of Ornithology, Ithaca, NY  
10 14850, USA

11 <sup>2</sup>Department of Ecology and Evolutionary Biology, Cornell University, E145 Corson Hall,  
12 Ithaca, NY 14853, USA

13 <sup>3</sup>Macaulay Library, Cornell Lab of Ornithology, 159 Sapsucker Woods Rd, Ithaca, NY  
14 14850, USA

15 <sup>4</sup>Department of Neurobiology and Behavior, Cornell University, W361 Mudd Hall, 215  
16 Tower Rd, Ithaca, NY 14853, USA  
17

18 **Keywords:** double-digest restriction site-associated DNA sequencing (ddRAD-seq),  
19 microsatellite, single nucleotide polymorphism (SNP), parentage, relatedness,  
20 cooperative breeding  
21

22 \*Corresponding author: Derrick J. Thrasher, Macaulay Library, Cornell Lab of  
23 Ornithology, 159 Sapsucker Woods Rd, Ithaca, NY 14850, USA. Fax: (607) 254-2439.  
24 Email: [djt224@cornell.edu](mailto:djt224@cornell.edu)  
25  
26

27 Running title: SNPs outperform microsatellite loci  
28  
29  
30  
31  
32  
33  
34  
35  
36  
37  
38  
39  
40  
41  
42  
43

44 **Abstract**

45 Information on genetic relationships among individuals is essential to many  
46 studies of the behavior and ecology of wild organisms. Parentage and relatedness  
47 assays based on large numbers of SNP loci hold substantial advantages over the  
48 microsatellite markers traditionally used for these purposes. We present a double-digest  
49 restriction site-associated DNA sequencing (ddRAD-seq) analysis pipeline that, as such,  
50 simultaneously achieves the SNP discovery and genotyping steps and which is  
51 optimized to return a statistically powerful set of SNP markers (typically 150-600 after  
52 stringent filtering) from large numbers of individuals (up to 240 per run). We explore the  
53 tradeoffs inherent in this approach through a set of experiments in a species with a  
54 complex social system, the variegated fairy-wren (*Malurus lamberti*), and further validate  
55 it in a phylogenetically broad set of other bird species. Through direct comparisons with  
56 a parallel dataset from a robust panel of highly variable microsatellite markers, we show  
57 that this ddRAD-seq approach results in substantially improved power to discriminate  
58 among potential relatives and substantially more precise estimates of relatedness  
59 coefficients. The pipeline is designed to be universally applicable to all bird species (and  
60 with minor modifications to many other taxa), to be cost- and time-efficient, and to be  
61 replicable across independent runs such that genotype data from different study periods  
62 can be combined and analyzed as field samples are accumulated.

63

64

65

## 66 **Introduction**

67           Advances in molecular techniques over the past several decades have  
68 substantially improved our ability to test questions about animal social behavior by  
69 providing reliable information on the genetic relationships among individuals (Westneat  
70 *et al.* 1990; Hughes 1998; Avise *et al.* 2002; Griffith *et al.* 2002; Solomon *et al.* 2004;  
71 Myers & Zamudio 2004). Microsatellites have been the molecular ‘tool-of-choice’ for this  
72 application since the 1990s, as microsatellite loci are often highly polymorphic, with up to  
73 dozens of co-segregating alleles at a single locus (Queller *et al.* 1993; Li *et al.* 2002;  
74 Selkoe & Toonen 2006; Guichoux *et al.* 2011). Accordingly, a small number of highly  
75 variable microsatellite loci can provide considerable power for discerning genetic  
76 relationships among individuals (Queller *et al.* 1993; Blouin 2003; Webster & Reichart  
77 2005). However, microsatellite assays also have some practical drawbacks.  
78 Microsatellite laboratory protocols developed for one species are often not suitable for  
79 use in other species, especially in more distantly related taxa (Galbusera 2000;  
80 Decroocq *et al.* 2003; Hedgecock *et al.* 2004; Primmer *et al.* 2005). Traditional PCR-  
81 based microsatellite assays incur substantial financial and lab-bench time investments.  
82 The manual scoring of microsatellite alleles also requires substantial researcher time,  
83 and can involve various forms of error arising from alleles that have more than one  
84 clearly defined peak, allelic drop-out and null allele issues, and the various sources of  
85 human error that are inherent in any complicated workflow (Pemberton *et al.* 1995;  
86 Hedgecock *et al.* 2004; Hoffman & Amos 2005; Kalinowski *et al.* 2007).

87           Many of these limitations are less severe in assays based on single-nucleotide  
88 polymorphisms (SNPs), which require fewer steps and have greater automation (Gut  
89 2001; Syvänen 2001; Seeb *et al.* 2011; Davey *et al.* 2011). SNPs are appropriate  
90 alternatives for studies of parentage and relatedness data because they are abundant in  
91 the genome, have low mutation rates (Brumfield *et al.* 2003; Morin *et al.* 2004), and can  
92 be scored semi-automatically (Garvin *et al.* 2010; Guichoux *et al.* 2011). In comparison  
93 to microsatellite-based relationship tests, the primary limitation of SNPs is that SNPs are  
94 typically biallelic, whereas microsatellite loci are often multiallelic, and hence the  
95 statistical power of SNP loci for discriminating parentage and relatedness is far lower on  
96 a per-locus basis (Ball *et al.* 2010). Compared to highly variable microsatellite loci, a  
97 substantially higher number of SNP markers is therefore required to achieve appropriate  
98 power in parentage and relatedness studies (Glaubitz *et al.* 2003; Morin *et al.* 2004;  
99 Coates *et al.* 2009).

100           Recently, the application of SNPs for use in analyses of parentage, relatedness,  
101 and overall population structure has received greater attention (Glaubitz *et al.* 2003;  
102 Anderson & Garza 2006; Coates *et al.* 2009). Studies in birds (Cramer *et al.* 2011;  
103 Weinman *et al.* 2014; Kaiser *et al.* 2016), fish (Hauser *et al.* 2011), and several  
104 domesticated taxa (Tokarska *et al.* 2009; Fernández *et al.* 2013) have developed SNP  
105 panels with a sufficient number of SNPs to attain a comparable, if not better, level of  
106 resolving power as highly polymorphic microsatellite panels. While each of these studies  
107 manage to identify powerful SNP panels, the SNP genotyping methods used are often  
108 labor intensive, requiring a significant amount of preparatory work at the discovery stage

109 prior to genotyping of large numbers of individuals. Many of these methods also rely on  
110 reference genomes (Anderson & Garza 2006; Heylar *et al.* 2011), or other genomic  
111 resources (Fernández *et al.* 2013; Weinman *et al.* 2014; Kaiser *et al.* 2016) (e.g.  
112 transcriptome, SNP microarray), for SNP identification. Ultimately, this has afforded  
113 several beneficial examples of the utility of SNPs for parentage and relatedness  
114 analyses, but without an efficient, universal method of SNP discovery and identification.

115       Restriction site-associated DNA sequencing (RAD-seq) is widely used in  
116 molecular genetic studies (Davey & Blaxter 2010; Etter *et al.* 2012; Puritz *et al.* 2014),  
117 particularly for linkage and quantitative trait locus (QTL) mapping (Baird *et al.* 2008),  
118 genome wide association studies (Davey *et al.* 2011), and phylogeography (Andrews *et al.*  
119 *al.* 2016). RAD-seq uses a restriction enzyme to fragment and sample a fraction of a  
120 genome; as it identifies SNPs with no prior knowledge of the genome, it provides a more  
121 universal method of SNP discovery (Willing *et al.* 2011). Double-digest restriction site-  
122 associated DNA sequencing (ddRAD-seq) allows for selection of an even smaller  
123 fraction of the genome through the combined use of two restriction enzymes, affording  
124 the ability to target a smaller total number of SNPs in a greater number of individuals  
125 (Peterson *et al.* 2012; Puritz *et al.* 2014; Kess *et al.* 2016). This ability, in concert with  
126 the fact that no prior knowledge of the genome is needed, makes ddRAD-seq an  
127 attractive method of simultaneous SNP discovery and screening for use in discerning  
128 genetic relationships among individuals.

129       Here, we describe a ddRAD-based approach to the simultaneous discovery and  
130 screening of high numbers of SNP loci with high power for testing questions about

131 parentage and relatedness. These protocols are optimized to generate an appropriately  
132 robust set of SNP markers for 240 individuals per run, to be repeatable across runs to  
133 allow the combination of SNP datasets generated at different times, and to be  
134 universally applicable to birds (and with small modifications, to other organisms) without  
135 requiring a species-specific marker discovery step. We validate these methods by  
136 conducting a SNP-based parentage and relatedness study in the highly promiscuous,  
137 and socially complex, variegated fairy-wren (*Malurus lamberti*). We compare the results  
138 with previously generated paternity assignments and relatedness information, based on  
139 microsatellite screens of the same fairy-wren individuals and social groups. To illustrate  
140 the broad utility of this method we report summary statistics for equivalent studies of  
141 parentage in a variety of other species that collectively span much of the phylogenetic  
142 diversity of living birds.

143

## 144 **Methods & Materials**

### 145 *Study Population*

146 The variegated fairy-wren, endemic to Australia, is a cooperatively breeding bird  
147 that lives in social groups composed of kin and non-kin (Schodde 1982; Rowley &  
148 Russell 1997). Male dispersal is limited, and rates of extra-pair fertilizations (EPFs) are  
149 high (~68% of all young, assessed with a panel of 12 species-specific microsatellites; DJ  
150 Thrasher, unpublished data). We intensively monitored a color-banded population of the  
151 nominate subspecies, *M. l. lamberti*, on Lake Samsonvale (27°16' S, 152° 41' E), 30 km  
152 northwest of Brisbane, Queensland, Australia, from 2012 – 2016. The population

153 ranges from about 250-300 adults depending on year-to-year conditions. The study site  
154 is bounded on most sides by Lake Samsonvale, and on its westernmost side by a major  
155 highway, which increases our confidence in sampling most, if not all, of the adults in the  
156 population. We also monitored all nesting attempts to measure, mark, and collect blood  
157 samples from nestlings 6 days after hatching. Blood samples were immediately stored in  
158 lysis buffer (White & Densmore 1992), and genomic DNA was later extracted using  
159 Qiagen DNeasy Blood and Tissue kits. DNA concentration was determined using the  
160 Qubit dsDNA BR Assay Kit and the Qubit® Fluorometer (Life Technologies) following  
161 the manufacturers protocol.

162

### 163 *Microsatellite development and genotyping*

164 We previously developed twelve polymorphic microsatellite loci for the variegated  
165 fairy-wren (Table S1, Supporting information) following methods described previously in  
166 Nali *et al.* (2014). Briefly, we extracted genomic DNA from blood in lysis buffer from eight  
167 adults in our study population, enriched the mix of DNA with repetitive sequences to  
168 develop an enriched microsatellite library, and conducted an Illumina MiSeq sequencing  
169 run. From this pool of sequences, we optimized twelve loci that amplified well using  
170 polymerase chain reaction (PCR), were polymorphic, and exhibited clearly defined  
171 peaks for genotyping. We designed three multiplexed PCRs for genotyping, and each  
172 amplification reaction contained 1ul of genomic DNA of varying concentrations (1 ng-40  
173 ng per 1 ul). PCR products were combined with the GeneScan 500 base pair LIZ  
174 internal size standard for size-sorting using a 3730 DNA Analyzer. We used Geneious

175 version 8.0 (Kearse *et al.* 2012) to score alleles. The program automatically identifies  
176 alleles at each locus, and we manually inspected allele calls to minimize genotyping  
177 error. In total, we genotyped 287 adults and 482 nestlings from 226 nests sampled  
178 during the 2012-2016 breeding seasons.

179

### 180 *ddRAD sequencing*

181 We selected a subset of the individuals genotyped for microsatellite loci (120  
182 adults and 40 nestlings) for use in our ddRAD-seq experiment and subsequent  
183 analyses. To assess the reliability of our SNP panel for parentage and relatedness  
184 analysis, we chose representative nestlings from all the years of our study. Typically, we  
185 selected one nestling from any individual nest. In a few cases, we selected two nestlings  
186 that prior microsatellite analysis had assigned to the same mother but different fathers.  
187 For each nestling, we included the mother, the social father, and the genetic father as  
188 assigned by previous microsatellite analysis. Our pool of candidate parents included 24  
189 mothers and 78 putative fathers, and 18 randomly selected individuals of both sexes, for  
190 a total of 120 adults.

191 Our ddRAD-seq protocol is adapted from Peterson *et al.* (2012) (see Supporting  
192 information for a detailed protocol). Briefly, for each individual, 100ng - 500ng of DNA  
193 (20ul of DNA between concentrations of 5ng/ul - 25ng/ul) were digested with either SbfI  
194 and MspI, or SbfI and EcoRI (NEB), and ligated with one of 20 P1 adapters (each  
195 containing a unique inline barcode) and a P2 adapter (P2-MspI or P2-EcoRI). After  
196 digestion and ligation these samples were pooled in groups of 20 (each with a unique P1



197 adpater) and purified using 1.5X volumes of homemade MagNA made with Sera-Mag  
198 Magnetic Speed-beads (FisherSci) as described by Rohland & Reich (2012). Fragments  
199 of between 450 bp and 600 bp were selected using BluePippin (Sage Science) by the  
200 Cornell University Biotechnology Resource Center (BRC). Following size selection,  
201 index groups and Illumina sequencing adapters were added by performing 11 PCR  
202 cycles with Phusion DNA Polymerase (NEB). These reactions were cleaned up with 0.7x  
203 volumes of MagNA and pooled in equimolar ratios to create a single library for  
204 sequencing on one lane of Illumina HiSeq 2500 (100bp single end, performed by BRC).

205 By replicating 20 samples (run as a separate index group) with a wider  
206 BluePippin size selection range of 400-700 bp, we explored the inherent trade-off  
207 between the number of samples sequenced on a lane at a given coverage threshold and  
208 the number of SNPs recovered per sample. We similarly explored the effects of using a  
209 less frequent restriction enzyme digest (by substituting the 6 bp cutter EcoRI in place of  
210 the 4 bp cutter MspI) to generate a smaller total number of fragments in our size range,  
211 which in turn should increase the sequencing coverage of the loci screened.

212 To assess repeatability across index groups, we replicated two index groups,  
213 each comprised of 20 samples: one index group from the standard protocol, and the  
214 index group generated with the rare-cutter EcoRI enzyme (Table 1). We multiplexed the  
215 resulting 240 samples in 12 index groups (with 20 individuals each) which were pooled  
216 into a final library that was sequenced on one lane of an Illumina HiSeq 2500, producing  
217 220,300,739 100 bp single end reads (see Table 1).

218

219 *SNP data analysis*

220

221 Quality filtering and demultiplexing

222       After the quality of the reads was assessed using FASTQC version 0.11.5  
223 (www.bioinformatics.babraham.ac.uk/projects/fastqc), we trimmed all sequences to 97bp  
224 using fastX\_trimmer (FASTX-Toolkit) to exclude low quality calls near the 3' of the reads.  
225 We subsequently removed reads containing a single base with a Phred quality score of  
226 less than 10 (using fastq\_quality\_filter). We additionally removed sequences if more  
227 than 5% of the bases had a Phred quality score of less than 20. Using process\_radtags  
228 module from the Stacks version 1.37 pipeline (Catchen *et al.* 2013), we demultiplexed  
229 the reads to obtain files with sequences that were specific to each individual.

230

231 De novo assembly of RAD loci

232       Because we do not have a sequenced genome for the variegated fairy wren or a  
233 close relative – which is likely to be the case for many non-model organisms involved in  
234 parentage studies – we assembled the sequences de novo using the Stacks pipeline  
235 (Catchen *et al.* 2013). First, we used denovo\_map.pl to assemble the reads into a  
236 catalog allowing a minimum stack depth of 5 (m parameter), up to 5 mismatches per  
237 locus within an individual (M parameter), and 5 mismatches between loci of different  
238 individuals when building the catalog (n parameter). We ran the rxstacks module to filter  
239 loci with a log likelihood of less than -50 (lnl\_lim -50) or that were confounded in at least

240 25% of the population (conf\_lim 0.25). We then built a new catalog by rerunning cstacks  
241 and obtained individual genotype calls with sstacks.

242

### 243 SNP filtering

244 SNPs were exported using the populations module of the Stacks pipeline. All of  
245 our samples were grouped in one population and a locus was exported if it was present  
246 in 95% of the individuals in this population (r parameter) at a stack depth of at least 10  
247 (m parameter). The data were restricted to the first SNP per locus (--write\_single\_snp),  
248 and a minor allele frequency of at least 0.25 was required to process a nucleotide site (--  
249 min\_maf).

250 Using vcftools version 0.1.14 (Danecek *et al.* 2011), we removed loci that were  
251 not in Hardy-Weinberg equilibrium (---hwe). We obtained a variant call format file that  
252 was converted to structure format in PGD Spider version 2.0.5.0 (Lischer & Excoffier  
253 2012) and further modified to a format compatible with CERVUS version 3.0.7  
254 (Kalinowski *et al.* 2007) using a custom perl script.

255

### 256 *Parentage Analysis*

257 We used CERVUS version 3.0.7 (Kalinowski *et al.* 2007) to assign paternity for all  
258 nestlings using our microsatellite and SNP datasets separately. CERVUS uses a two-  
259 step, likelihood-based approach to assign parentage. First, CERVUS compares each  
260 offspring's genotype to that of a candidate parent and a random individual in the  
261 population to calculate a likelihood ratio. This relationship is presented as an LOD score,

262 which is simply the natural logarithm of the calculated likelihood ratio. Positive LOD  
263 scores indicate that a candidate parent is much more likely to be the true parent,  
264 whereas negative LOD scores indicate that the candidate parent is highly unlikely to be  
265 a true parent. Second, CERVUS conducts a simulation of parentage analysis based on  
266 population allele frequencies and the proportion of potential parents included in the  
267 analysis. The simulation accounts for the possibility of unsampled parents, missing data,  
268 and genotyping errors. Considering these parameters, the simulation calculates critical  
269 LOD scores by comparing the LOD distributions of the most likely parent and all other  
270 candidate parents. The critical LOD score is used to determine the confidence (95% or  
271 80%) of each parentage assignment.

272 CERVUS allows for different types of parentage analysis, including parent-pair  
273 (sexes known or unknown), maternity (known father, but not mother), and paternity  
274 (known mother, but not father). Variegated fairy-wrens at Lake Samsonvale are relatively  
275 easy to observe, and we were able to assign known mothers behaviorally. We  
276 subsequently confirmed this with microsatellite analyses: females that built and attended  
277 a nest throughout incubation were always the mothers of the nestlings in that nest. In  
278 many systems, a comparable level of demographic knowledge may not be available, so  
279 a marker set must be powerful enough to assign parentage with minimal social  
280 information. To investigate the broader utility of our ddRAD-seq method, we conducted  
281 analyses that relied on the inclusion of the known mother, in addition to analyses  
282 independent of the known mother, which were based only on the father-offspring  
283 relationship. We simulated paternity assignments for 10,000 offspring to determine

284 critical LOD scores, using slightly different input parameters for each panel  
285 (microsatellites and ddRAD sequencing derived SNPs). Simulations for both used the  
286 following parameters: 78 candidate males, 95% of candidate males sampled, estimated  
287 error rate of 0.01 for mistyped loci and likelihood scores. The proportion of loci typed  
288 across all individuals was different for both panels: 0.997 for the microsatellite  
289 simulation, and 0.961 for the SNP simulation.

290 For both paternity analyses, we used the trio LOD score and the father-offspring  
291 LOD score from CERVUS to make assignments. The trio LOD score was calculated by  
292 comparing the genotypes of the candidate male and offspring, relative to that of the  
293 known mother. The father-offspring LOD score only accounts for the relationship of the  
294 candidate male and the offspring, independent of the known mother. CERVUS ranked  
295 candidate males by LOD scores in each category, and the highest-ranking males were  
296 assigned as fathers. These rankings should be in agreement, but ambiguous  
297 assignments (different top-ranking males assigned in each category) may occur when  
298 multiple candidate male genotypes closely match an offspring's genotype.

299 We assessed each CERVUS assignment to determine whether it was plausible,  
300 and whether the assigned male was the social father or an extra-pair sire. Our criteria for  
301 accepting assignments differed slightly for microsatellites and SNPs. For microsatellites,  
302 we automatically accepted the CERVUS assignment if the highest-ranking male was in  
303 agreement for both the trio LOD and the father-offspring LOD, and if the number of  
304 mismatches between the assigned male and the offspring was  $\leq 1$  (8% of 12 loci). For  
305 SNPs, we also accepted the assignment if the highest-ranking males by LOD score type

306 were in agreement, and an allowable number of mismatches were not exceeded.  
307 However, for SNPs, our allowable number of mismatches was based on the observed  
308 maximum number of mismatches between a known mother and her known offspring  
309 (max. = 7, mean = 3.4, 2% of 411 loci). For both panels, we accepted the social father  
310 as the genetic sire if he met these respective criteria. If the social father mismatched the  
311 offspring at higher numbers, or had negative LOD scores, the offspring was considered  
312 sired by an extra-pair father. We accepted assignments of extra-pair fathers using the  
313 same criteria outlined above. We did not observe cases in which an offspring could not  
314 be assigned to either its social father, or an extra-pair sire.

315

### 316 *Relatedness Analysis*

317 We used the package, “related” (Pew *et al.* 2015), in R version 3.2.5 (R Core  
318 Team 2016) to estimate pairwise relatedness ( $r$ ) between all pairs of individuals in this  
319 study. This package accounts for genotyping errors, missing data, and can estimate  
320 relatedness using any of seven different estimators (4 non-likelihood-based, and 3  
321 likelihood-based). “related” includes the function, **compareestimators**, which tests the  
322 performance of different estimators on simulated data that share the same  
323 characteristics as the real data. The program uses an allele frequency file to generate  
324 simulated pairs of individuals of known relatedness, and automatically estimates  
325 relatedness using four of the most commonly used estimators (all non-likelihood-based).  
326 The function calculates a correlation coefficient between observed and expected values,  
327 to evaluate which estimator performs best with the data set. Using **compareestimators**

328 to generate 200 simulated pairs of individuals for each degree of relatedness (i.e., half-  
329 sib, full-sib, parent-offspring, unrelated), we determined that the Wang (2002) estimator  
330 performed best for both our microsatellite and SNP datasets. We obtained point  
331 estimates of relatedness using the Wang (2002) estimator, and evaluated all parent-  
332 offspring relationships that were previously determined in our parentage analysis.

333 “Related” also evaluates how well different marker sets resolve degrees of  
334 relatedness, given simulated genotypes based on allele frequency files. For both panels,  
335 we used the **familysim** function to generate 200 pairs of individuals for each degree of  
336 relatedness. We then used the **coancestry** function to analyze all pairwise relatedness  
337 values with the Wang (2002) estimator. We created density plots representing  
338 histograms of the relatedness values. These plots show the overlap in relatedness  
339 values for degree of relatedness, and we used them to infer how well each panel  
340 performed at discerning different relationships.

341

## 342 **Results**

### 343 *SNP development and analysis*

344 After trimming, filtering and demultiplexing the data, we retained a total of  
345 109,524,874 reads across all index groups, with an average of approximately 9,000,000  
346 reads per index group. Two individuals failed (i.e., had less than 66,000 reads each; one  
347 individual from each of two index groups) and were excluded from further analysis. The  
348 number of reads per sample for the remaining individuals ranged from 213,544 to  
349 810,966 (mean = 459,726  $\pm$  118,771 std. dev.).

350 Further analysis using the population program from stacks identified loci with at  
351 least 10X coverage, present in 95% of the individuals, and a minimum allele frequency  
352 greater than 25%. We further retained only those loci that were in Hardy-Weinberg  
353 equilibrium. When performing analyses on all 160 individuals from the primary  
354 comparison runs (Table 1), we identified 411 loci that fulfilled these criteria and were  
355 used for downstream analyses.

356 We varied two aspects of the ddRAD-seq protocol to assess the number of loci  
357 recovered and the reproducibility of the method. As expected, both a reduction in the  
358 range of fragment sizes selected during the construction of the library (compare index 1  
359 (150 bp size selection) and index 10 (300 bp size selection)) or the use of the less  
360 frequent cutter, EcoRI (index 11 and 12), resulted in fewer loci recovered (Table 3).  
361 Those from the EcoRI digest were non-overlapping with those from the MspI index  
362 groups. More importantly, between the replicated index groups in our standard protocol  
363 (index 1 and index 9) we recovered similar numbers of loci (797 and 645, respectively)  
364 with 549 (85.1%) loci found in both datasets (under our stringent filtering criteria).

365

### 366 *Paternity assignments*

367 Both panels produced highly concordant results when assigning paternity, but the  
368 SNP panel showed substantially higher power overall. Generally, the microsatellite loci  
369 were more polymorphic, resulting in greater mean polymorphic information content (PIC)  
370 for any given locus. Despite this, the SNP panel performed better because of the large  
371 number of loci obtained through RAD sequencing. This greatly improved the non-



372 exclusion probabilities across different parentage assignment contexts (Table 2), and  
373 reduced uncertainty in our assignments. Given the known mother, the microsatellite and  
374 SNP panels assigned the same fathers to all 40 offspring with 95% confidence. When  
375 paternity assignments were made without the known mother (no known candidate  
376 parents), both panels again assigned fathers for all 40 offspring with 95% confidence.  
377 However, 5 of these assignments were not in agreement between the two panels. For  
378 these 5 cases, two candidate males had very similar LOD scores under the  
379 microsatellite panel, and the assigned males did not match the males that were  
380 assigned given the known mother. These (and all other) cases were resolved  
381 unambiguously when the SNP panel was used, and the paternity assignments with and  
382 without the known mother were in complete agreement for all offspring (Fig. 1).

383 Overall, both panels assigned 23 out of 40 nestlings (57.5%) to males that were  
384 not their social father. Due to the nature of our non-random sampling of individuals for  
385 this experiment, and the overall smaller sample size, this value is slightly lower than the  
386 overall rate of 67.6% extra-pair young observed for all years of the study (unpublished  
387 data).

388 As a measure of certainty for our assignments, we calculated the difference  
389 between LOD scores for the two top-ranked males assigned to each nestling, under  
390 each panel (Fig. 2). Typically, this difference was 8 – 10x higher for the SNP panel  
391 ( $n=40$ , mean = 165.0) than for the microsatellite panel ( $n=40$ , mean 19.1), a reflection of  
392 the much higher discriminatory power of the SNP dataset. For the SNP panel, many of  
393 the second-ranked males had a strongly negative LOD score, making them extremely

394 unlikely to be the true father. This was less often true for the microsatellite panel, as the  
395 second-ranked males often had positive, or just slightly negative, LOD scores. Overall  
396 this result illustrates the increased discrimination power achieved by the SNP panel  
397 compared to the microsatellites, which allowed us to assign paternity in cases in which  
398 the microsatellite assignments remained ambiguous or (albeit rarely) misleading.

399

#### 400 *Relatedness analysis*

401 The SNP panel produced simulated data that closely matched the observed allele  
402 and genotype frequencies (Pearson's correlation coefficient = 0.975). The microsatellite  
403 panel also matched well, but was not as reliable as the SNP panel (Pearson's  
404 correlation coefficient = 0.877). This resulted in better estimates of pairwise relatedness  
405 for parent-offspring using the SNP panel (Fig. 3). Overall, the SNP panel produced  
406 better simulated estimates for each degree of relatedness (Fig. 4), greatly reducing the  
407 variance around expected relatedness values (unrelated = 0, half-sib = 0.25, full-sib =  
408 0.5, and parent-offspring = 0.5). This bolsters the confidence with which actual  
409 relationships can be discerned when calculating pairwise relatedness of a population for  
410 which there is little prior knowledge of social relationships.

411

#### 412 **Discussion**

413 Several recent studies have rigorously investigated the use of SNPs in population  
414 genetic studies for several non-model organisms (Morin *et al.* 2004; Slate *et al.* 2010;  
415 Garvin *et al.* 2010; Heylar *et al.* 2011; Seeb *et al.* 2011), with growing support for the use

416 of SNPs in studies of parentage (Anderson & Garza 2006; e.g. Hauser *et al.* 2011; e.g.  
417 Kaiser *et al.* 2016; e.g. Kess *et al.* 2016) and relatedness (e.g. Glaubitz *et al.* 2003;  
418 Wang 2007). SNPs have proven to perform as well, if not better, than microsatellites in  
419 these types of studies. To our knowledge this is the first study to describe a universal  
420 ddRAD-seq method for use in parentage and relatedness analyses of wild populations of  
421 birds. Our study is also the first to compare the efficiency of microsatellites versus SNPs  
422 for determining genetic relationships in a species that is both socially complex, and  
423 highly promiscuous. We show that SNPs developed from our modified ddRAD-seq  
424 method are substantially more powerful than a moderate number of species-specific  
425 microsatellite loci at assigning paternity and estimating relatedness among individuals.  
426 Our method is highly attractive as an alternative to traditional microsatellite genotyping,  
427 especially for systems where no microsatellites have been developed. This is largely  
428 due to the combination of its cost and researcher time efficiency, the ease of this non-  
429 species-specific method that combines the SNP discovery and screening steps, and the  
430 large number of SNPs reliably recovered.

431         The total approximate materials cost for our ddRAD-seq analyses, including DNA  
432 extraction, normalization of the DNA concentrations, library preparation, sequencing and  
433 computational time was US\$3,270.00 for 240 samples, or approximately \$13.63 per  
434 sample. The use of a homemade MagNA in place of commercial SPRI beads provides  
435 significant savings. This cost is similar to that for genotyping 240 individuals at 12  
436 microsatellite loci (in 3 multiplexed PCR mixes), in a situation where the labelled primers  
437 have already been designed, purchased, and tested. However, a substantial additional

438 benefit of this ddRAD-seq method is that it does not require any locus discovery or  
439 development before starting. The time required for library preparation, once DNA has  
440 been extracted, is modest, and once the sequence data have been obtained, SNP  
441 calling for the entire dataset can be performed in less than a day through a largely  
442 automated bioinformatics pipeline. Unlike manually scoring peaks as in a traditional  
443 microsatellite genotyping analysis, the identification of SNPs is less subjective and takes  
444 far fewer hours of hands-on analysis (as most is performed computationally). The tools  
445 for analyzing these ddRAD data are freely available and widely used (e.g., Stacks,  
446 VCFtools).

447         For this study, our conditions and protocol allowed us to recover 411 high quality  
448 SNP loci for 240 individual samples. However, we show that through simple variations in  
449 the size selection window or the specificity of the restriction enzyme, more or fewer loci  
450 can be obtained. For some applications, it could be advantageous to multiplex a greater  
451 number of individuals and achieve similar coverage by aiming to recover fewer loci (e.g.,  
452 using EcoRI rather than MspI). Alternatively, for applications where more loci are  
453 required, the size selection window could be widened and concordantly the number of  
454 individuals would have to be lowered.

455         The number of SNPs needed to perform robust parentage and relatedness  
456 analyses depends on characteristics of the study population. Populations with reduced  
457 genetic diversity will likely require a greater number of loci than those that are more  
458 genetically diverse (Saunders *et al.* 2007; Strucken *et al.* 2016; Tortereau *et al.* 2017).  
459 Obtaining more loci from the outset would aid in overcoming any issues relating to

460 population genetic diversity. Additionally, when studying species with complex social  
461 systems, including for example both variable levels of genetic relatedness among  
462 individuals and high rates of extra-pair fertilizations, it is imperative to obtain a sufficient  
463 number of markers to discern genetic relationships robustly (Hughes 1998; Ross 2001;  
464 Weinman *et al.* 2014). Our case study, using the variegated fairy-wren, shows that our  
465 modified ddRAD-seq method recovers more than enough SNP loci to confidently discern  
466 relationships in a species with a complex social system. Most parentage and  
467 relatedness analysis programs are well equipped to handle large numbers of loci, so a  
468 greater number of loci would not hinder analyses. Once an appropriate number of SNPs  
469 are identified for performing robust analyses, conditions can be varied to maximize the  
470 number of individuals to be genotyped.

471 For both paternity and relatedness analyses, our SNP panel far outperformed our  
472 microsatellite panel by providing much more power and improving the overall confidence  
473 for assignments. Variegated fairy-wrens are relatively easy to observe, and every nest  
474 found can be assigned to a known mother by watching the female that builds the nest  
475 and/or incubates the eggs. This level of knowledge may not be the norm for most study  
476 systems, so we also investigated the CERVUS output for male-offspring relationships,  
477 independent of known mothers. In doing so, the reliability of the SNP panel became  
478 even more evident. In CERVUS, the higher the LOD score, the more likely that a given  
479 male is the true father. Using SNPs, CERVUS typically output only a single male with a  
480 positive LOD score, and the difference in LOD scores between the top-two ranked males  
481 was dramatically different for SNP assignments (Fig. 2). When social information about

482 the known mother was excluded from the paternity analysis, the microsatellite panel  
483 sometimes produced assignments that were ambiguous (two males had similar LOD  
484 scores), and occasionally the wrong male was assigned paternity of the offspring. Under  
485 the SNP panel, ambiguous assignments were nonexistent, and these cases were clearly  
486 resolved (Fig. 1).

487 It is sometimes difficult to obtain appropriate demographic data to use in a formal  
488 parentage analysis, and for many studies, this level of detail may not be necessary.  
489 Population allele frequencies can be used to estimate pairwise relatedness for  
490 individuals, and to reconstruct pedigrees using maximum likelihood-based methods.  
491 Variance in estimates of pairwise relatedness ( $r$ ) for known parent-offspring pairs was  
492 dramatically reduced when using SNPs (Fig. 3). For our simulations, SNPs greatly  
493 improved the differentiation between distributions for individuals of known degrees of  
494 relatedness (Fig. 4). This is particularly important for systems with minimal demographic  
495 and observational data, where these distributions can be used to determine familial  
496 relationships between individuals, in conjunction with actual estimated  $r$ -values.

497 In summary, our ddRAD-seq method provides a cost effective and robust way to  
498 identify SNPs for use in studies utilizing parentage and relatedness analyses. Our  
499 experiment shows that a majority of the same SNPs can be obtained across groups,  
500 using the same size selection windows and restriction enzymes. Future individuals can  
501 be genotyped and incorporated to the analysis by re-running the Stacks pipeline. Using  
502 a bird exhibiting great social complexity, and high promiscuity, we have shown that  
503 SNPs identified by ddRAD-seq are more effective at assigning paternity and estimating

504 relatedness than highly polymorphic, species-specific microsatellite loci. This protocol  
505 was designed to be universally applicable across bird species, and we have successfully  
506 applied it in a range of other avian study systems (Table 4). While different numbers of  
507 individuals were used in each study and therefore different numbers of loci were  
508 recovered, in all cases paternity was confidently assigned to nestlings using CERVUS  
509 (unpublished results). Applying this general protocol to many non-avian taxa may simply  
510 require ensuring that the specific restriction enzymes and fragment size windows are  
511 chosen appropriately.

512

### 513 **Acknowledgements**

514 We thank D. Baldassarre, K. Gielow, J. Welklin, and field technicians at Lake  
515 Samsonvale who assisted with field efforts for this study. We are grateful to L. Stenzler  
516 and S. Bogdanowicz for help with microsatellite discovery, development, and  
517 genotyping. D. Baldassarre, E. Greig, & A. Dalziel provided valuable discussion on the  
518 study design. This research was supported by the US National Science Foundation  
519 (IOS-1353681 and DEB-1721662) .

520

521

522

523

524

525

526 **References**

- 527
- 528 Anderson EC, Garza JC (2006) The power of single-nucleotide polymorphisms for large-  
529 scale parentage inference. *Genetics*, **172**, 2567–2582.
- 530 Andrews KR, Good JM, Miller MR, Luikart G, Hohenlohe PA (2016) Harnessing the  
531 power of RADseq for ecological and evolutionary genomics. *Nature Reviews*  
532 *Genetics*, **17**, 81–92.
- 533 Avise JC, Jones AG, Walker D, Dewoody JA (2002) Genetic mating systems and  
534 reproductive natural histories of fishes: lessons for ecology and evolution. *Annual*  
535 *Review of Genetics*, **36**, 19–45.
- 536 Baird NA, Etter PD, Atwood TS *et al.* (2008) Rapid SNP discovery and genetic mapping  
537 using sequenced RAD markers. *PLoS ONE*, **3**, e3376.
- 538 Ball AD, Stapley J, Dawson DA *et al.* (2010) A comparison of SNPs and microsatellites  
539 as linkage mapping markers: lessons from the zebra finch (*Taeniopygia guttata* ).  
540 *BMC Genomics*, **11**, 218.
- 541 Blouin MS (2003) DNA-based methods for pedigree reconstruction and kinship analysis  
542 in natural populations. *Trends in Ecology & Evolution*, **18**, 503–511.
- 543 Brumfield RT, Beerli P, Nickerson DA, Edwards SV (2003) The utility of single nucleotide  
544 polymorphisms in inferences of population history. *Trends in Ecology & Evolution*,  
545 **18**, 249–256.
- 546 Catchen J, Hohenlohe PA, Bassham S, Amores A, Cresko WA (2013) Stacks: an  
547 analysis tool set for population genomics. *Molecular Ecology*, **22**, 3124–3140.
- 548 Coates BS, Sumerford DV, Miller NJ *et al.* (2009) Comparative Performance of Single  
549 Nucleotide Polymorphism and Microsatellite Markers for Population Genetic  
550 Analysis. *Journal of Heredity*, **100**, 556–564.
- 551 Cramer ERA, Hall ML, De Kort SR, Lovette IJ, Vehrencamp SL (2011) Infrequent Extra-  
552 Pair Paternity in the Banded Wren, a Synchronously Breeding Tropical Passerine.  
553 *The Condor*, **113**, 637–645.
- 554 Danecek P, Auton A, Abecasis G *et al.* (2011) The variant call format and VCFtools.  
555 *Bioinformatics*, **27**, 2156–2158.
- 556 Davey JW, Blaxter ML (2010) RADSeq: next-generation population genetics. *Briefings in*  
557 *Functional Genomics*, **9**, 416–423.
- 558 Davey JW, Hohenlohe PA, Etter PD *et al.* (2011) Genome-wide genetic marker  
559 discovery and genotyping using next-generation sequencing. *Nature Reviews*  
560 *Genetics*, **12**, 499–510.
- 561 Decroocq V, Fave MG, Hagen L, Bordenave L, Decroocq S (2003) Development and  
562 transferability of apricot and grape EST microsatellite markers across taxa.  
563 *Theoretical and Applied Genetics*, **106**, 912–922.
- 564 Etter PD, Bassham S, Hohenlohe PA, Johnson EA, Cresko WA (2012) SNP discovery  
565 and genotyping for evolutionary genetics using RAD sequencing. In: *Molecular*  
566 *Methods for Evolutionary Genetics Methods in Molecular Biology*. pp. 157–178.  
567 Humana Press, Totowa, NJ.
- 568 Fernández ME, Goszczynski DE, Lirón JP *et al.* (2013) Comparison of the effectiveness



- 569 of microsatellites and SNP panels for genetic identification, traceability and  
570 assessment of parentage in an inbred Angus herd. *Genetics and molecular biology*,  
571 **36**, 185–191.
- 572 Galbusera P (2000) Cross-species amplification of microsatellite primers in passerine  
573 birds. *Conservation Genetics*, **1**, 163–168.
- 574 Garvin MR, Saitoh K, Gharrett AJ (2010) Application of single nucleotide polymorphisms  
575 to non-model species: a technical review. *Molecular Ecology Resources*, **10**, 915–  
576 934.
- 577 Glaubitz JC, Rhodes OE, Dewoody JA (2003) Prospects for inferring pairwise  
578 relationships with single nucleotide polymorphisms. *Molecular Ecology*, **12**, 1039–  
579 1047.
- 580 Griffith SC, Owens IPF, Thuman KA (2002) Extra pair paternity in birds: a review of  
581 interspecific variation and adaptive function. *Molecular Ecology*, **11**, 2195–2212.
- 582 Guichoux E, Lagache L, Wagner S *et al.* (2011) Current trends in microsatellite  
583 genotyping. *Molecular Ecology Resources*, **11**, 591–611.
- 584 Gut IG (2001) Automation in genotyping of single nucleotide polymorphisms. *Human*  
585 *Mutation*, **17**, 475–492.
- 586 Hauser L, Baird M, Hilborn R, Seeb LW, Seeb JE (2011) An empirical comparison of  
587 SNPs and microsatellites for parentage and kinship assignment in a wild sockeye  
588 salmon (*Oncorhynchus nerka*) population. *Molecular Ecology Resources*, **11**, 150–  
589 161.
- 590 Hedgecock D, Li G, Hubert S, Bucklin K (2004) Widespread null alleles and poor cross-  
591 species amplification of microsatellite DNA loci cloned from the Pacific oyster,  
592 *Crassostrea gigas*. *Journal of Shellfish Research*, **23**, 379–385.
- 593 Heylar SJ, Hemmer Hansen J, Bekkevold D *et al.* (2011) Application of SNPs for  
594 population genetics of nonmodel organisms: new opportunities and challenges.  
595 *Molecular Ecology Resources*, **11**, 123–136.
- 596 Hoffman JI, Amos W (2005) Microsatellite genotyping errors: detection approaches,  
597 common sources and consequences for paternal exclusion. *Molecular Ecology*, **14**,  
598 599–612.
- 599 Hughes C (1998) Integrating molecular techniques with field methods in studies of social  
600 behavior: a revolution results. *Ecology*, **79**, 383–399.
- 601 Kaiser SA, Taylor SA, Chen N *et al.* (2016) A comparative assessment of SNP and  
602 microsatellite markers for assigning parentage in a socially monogamous bird.  
603 *Molecular Ecology Resources*, **17**, 183–193.
- 604 Kalinowski ST, Taper ML, Marshall TC (2007) Revising how the computer program  
605 CERVUS accommodates genotyping error increases success in paternity  
606 assignment. *Molecular Ecology*, **16**, 1099–1106.
- 607 Kearse M, Moir R, Wilson A *et al.* (2012) Geneious Basic: An integrated and extendable  
608 desktop software platform for the organization and analysis of sequence data.  
609 *Bioinformatics*, **28**, 1647–1649.
- 610 Kess T, Gross J, Harper, F, Boulding EG (2016) Low-cost ddRAD method of SNP  
611 discovery and genotyping applied to the periwinkle *Littorina saxatilis*. *Journal of*

- 612 *Molluscan Studies*, **82**, 104–109.
- 613 Li YC, Korol AB, Fahima T, Beiles A, Nevo E (2002) Microsatellites: genomic  
614 distribution, putative functions and mutational mechanisms: a review. *Molecular*  
615 *Ecology*, **11**, 2453–2465.
- 616 Lischer HEL, Excoffier L (2012) PGDSpider: an automated data conversion tool for  
617 connecting population genetics and genomics programs. *Bioinformatics*, **28**, 298–  
618 299.
- 619 Morin PA, Luikart G, Wayne RK (2004) SNPs in ecology, evolution and conservation.  
620 *Trends in Ecology & Evolution*, **19**, 208–216.
- 621 Myers EM, Zamudio KR (2004) Multiple paternity in an aggregate breeding amphibian:  
622 the effect of reproductive skew on estimates of male reproductive success.  
623 *Molecular Ecology*, **13**, 1951–1963.
- 624 Nali RC, Zamudio KR, Prado CPA (2014) Microsatellite markers for Bokermannohyla  
625 species (Anura, Hylidae) from the Brazilian Cerrado and Atlantic Forest domains.  
626 *Amphibia-Reptilia*, **35**, 355–360.
- 627 Pemberton JM, Slate J, Bancroft DR, Barrett JA (1995) Nonamplifying alleles at  
628 microsatellite loci: a caution for parentage and population studies. *Molecular*  
629 *Ecology*, **4**, 249–252.
- 630 Peterson BK, Weber JN, Kay EH, Fisher HS, Hoekstra HE (2012) Double digest  
631 RADseq: An inexpensive method for de novo SNP discovery and genotyping in  
632 model and non-model species (L Orlando, Ed.). *PLoS ONE*, **7**, e37135.
- 633 Pew J, Muir PH, Wang J, Frasier TR (2015) related: an R package for analysing pairwise  
634 relatedness from codominant molecular markers. *Molecular Ecology Resources*, **15**,  
635 557–561.
- 636 Primmer CR, N Painter J, T Koskinen M, U Palo J, Merilä J (2005) Factors affecting  
637 avian cross-species microsatellite amplification. *Journal of Avian Biology*, **36**, 348–  
638 360.
- 639 Puritz JB, Matz MV, Toonen RJ *et al.* (2014) Demystifying the RAD fad. *Molecular*  
640 *Ecology*, **23**, 5937–5942.
- 641 Queller DC, Strassmann JE, Hughes CR (1993) Microsatellites and kinship. *Trends in*  
642 *Ecology & Evolution*, **8**, 285–288.
- 643 R Core Team (2016) R: A Language and Environment for Statistical Computing. R  
644 Foundation for Statistical Computing, Vienna, Austria. [http:// www.R-project.org/](http://www.R-project.org/).
- 645 Rohland N, Reich D (2012) Cost-effective, high-throughput DNA sequencing libraries for  
646 multiplexed target capture. *Genome Research*, **22**, 939–946.
- 647 Ross KG (2001) Molecular ecology of social behaviour: analyses of breeding systems  
648 and genetic structure. *Molecular Ecology*, **10**, 265–284.
- 649 Rowley I, Russell EM (1997) *Fairy-wrens and Grasswrens: Maluridae*. Oxford University  
650 Press.
- 651 Saunders IW, Brohede J, Hannan GN (2007) Estimating genotyping error rates from  
652 Mendelian errors in SNP array genotypes and their impact on inference. *Genomics*,  
653 **90**, 291–296.
- 654 Schodde, R (1982). *The fairy-wrens* (ed. Bass T). The Craftsman Press. Victoria,

- 655 Australia.
- 656 Seeb JE, Carvalho G, Hauser L *et al.* (2011) Single-nucleotide polymorphism (SNP)
- 657 discovery and applications of SNP genotyping in nonmodel organisms. *Molecular*
- 658 *Ecology Resources*, **11**, 1–8.
- 659 Selkoe KA, Toonen RJ (2006) Microsatellites for ecologists: a practical guide to using
- 660 and evaluating microsatellite markers. *Ecology letters*, **9**, 615–629.
- 661 Slate J, Gratten J, Beraldi D *et al.* (2010) Gene mapping in the wild with SNPs:
- 662 guidelines and future directions. *Genetica*, **136**, 97–107.
- 663 Solomon NG, Keane B, Knoch LR (2004) Multiple paternity in socially monogamous
- 664 prairie voles (*Microtus ochrogaster*). *Canadian Journal of Zoology*, **82**, 1667–1671.
- 665 Strucken EM, Lee SH, Lee HK *et al.* (2016) How many markers are enough? Factors
- 666 influencing parentage testing in different livestock populations. *Journal of Animal*
- 667 *Breeding and Genetics*, **133**, 13–23.
- 668 Syvänen A-C (2001) Accessing genetic variation: genotyping single nucleotide
- 669 polymorphisms. *Nature Reviews Genetics*, **2**, 930–942.
- 670 Tokarska M, Marshall T, Kowalczyk R *et al.* (2009) Effectiveness of microsatellite and
- 671 SNP markers for parentage and identity analysis in species with low genetic
- 672 diversity: the case of European bison. *Heredity*, **103**, 326–332.
- 673 Tortereau F, Moreno CR, Tosser-Klopp G, Servin B, Raoul J (2017) Development of a
- 674 SNP panel dedicated to parentage assignment in French sheep populations. *BMC*
- 675 *Genetics*, **18**, 50.
- 676 Wang J (2002) An estimator for pairwise relatedness using molecular markers. *Genetics*,
- 677 **160**, 1203–1215.
- 678 Wang J (2007) Triadic IBD coefficients and applications to estimating pairwise
- 679 relatedness. *Genetical research*, **89**, 135–153.
- 680 Webster MS, Reichart L (2005) Use of microsatellites for parentage and kinship
- 681 analyses in animals. *Methods in enzymology*, **395**, 222–238.
- 682 Weinman LR, Solomon JW, Rubenstein DR (2014) A comparison of single nucleotide
- 683 polymorphism and microsatellite markers for analysis of parentage and kinship in a
- 684 cooperatively breeding bird. *Molecular Ecology Resources*, **15**, 502–511.
- 685 Westneat DF, Sherman PW, Morton ML (1990) The ecology and evolution of extra-pair
- 686 copulations in birds. *Current Ornithology*, **7**, 331–370.
- 687 White PS, Densmore LD (1992) Mitochondrial DNA isolation. In: *Molecular Genetic*
- 688 *Analysis of Populations: A Practical Approach* (ed. Hoelzel AR), pp. 50–51. Oxford
- 689 University Press, New York, NY.
- 690 Willing E-M, Hoffmann M, Klein JD, Weigel D, Dreyer C (2011) Paired-end RAD-seq for
- 691 de novo assembly and marker design without available reference. *Bioinformatics*,
- 692 **27**, 2187–2193.
- 693
- 694
- 695
- 696
- 697

698 **Data Accessibility**

699 The raw data used in this manuscript will be stored in the Dryad Digital Repository upon  
700 acceptance.

701

702 **Author Contributions**

703 D.J.T designed the study, collected field data, performed microsatellite development and  
704 analysis, conducted parentage and relatedness analyses, and drafted the manuscript  
705 with help from all co-authors. B.G.B and L.C. designed the study, and performed SNP  
706 discovery and analysis. M.S.W and I.J.L. helped design the study, and secured funding.

707

708

709

710

711

712

713

714

715

716

717

718

719

720

721

722

723

724

725

726

727

728

729

730

731

732

733

734

735

736

737

738

739

740

741 **Tables**

742 Table 1: Experimental design.

| # of samples (index groups)             | enzymes      | size selection interval             |
|-----------------------------------------|--------------|-------------------------------------|
| 160 samples (8 index groups, index 1-8) | Sbfl - MspI  | 450 - 600 bp                        |
| 20 samples (Index 9)                    | Sbfl - MspI  | 450 - 600 bp (replicate of above)   |
| 20 samples (index 10)                   | Sbfl - MspI  | 400 - 700 bp (wide size selection)  |
| 20 samples (index 11)                   | Sbfl - EcoRI | 450 - 600 bp (infrequent 3' cutter) |
| 20 samples (index 12)                   | Sbfl - EcoRI | 450 - 600 bp (replicate of above)   |

743

744

745

746

747

748

Table 2. Marker characteristics

| Marker Panel    | Number of loci | Mean proportion loci typed | Mean alleles per locus | Mean $H_e$ | Mean $H_o$ | Mean PIC | Nonexclusion probability (first parent) | Nonexclusion probability (second parent) | Nonexclusion probability (parent pair) |
|-----------------|----------------|----------------------------|------------------------|------------|------------|----------|-----------------------------------------|------------------------------------------|----------------------------------------|
| Microsatellites | 12             | 0.99                       | 14.17                  | 0.77       | 0.76       | 0.74     | $1.9 \times 10^{-4}$                    | $1.9 \times 10^{-6}$                     | $1.5 \times 10^{-10}$                  |
| SNPs            | 411            | 0.98                       | 2.00*                  | 0.45       | 0.45       | 0.35     | $5.2 \times 10^{-20}$                   | $6.9 \times 10^{-35}$                    | $1.0 \times 10^{-55}$                  |

\*Only biallelic SNPs were retained. If a locus had 3 alleles across the population, it was filtered from the dataset.

749

750

751

752

753

754

755

756

757

758

759

760

761

762

763

764

765

766

767

768

769 Table 3. Overlap in the RAD loci that were obtained while varying different steps of the  
 770 protocol (size selection and restriction enzymes). The diagonal indicates the total  
 771 number of loci recovered for each treatment. Values above the diagonal represent the  
 772 percent overlapping loci between groups (relative to the group with the smallest number  
 773 of loci), while values below the diagonal list the number of loci that were overlapping  
 774 between groups.

|     | All | A    | B    | C    | D   | E    |
|-----|-----|------|------|------|-----|------|
| All | 411 | 85.4 | 78.1 | 79.1 | 1.2 | 1.0  |
| A   | 351 | 797  | 85.1 | 75.8 | 0.8 | 0.8  |
| B   | 321 | 549  | 645  | 83.4 | 2.0 | 2.3  |
| C   | 325 | 604  | 538  | 1440 | 4.2 | 3.9  |
| D   | 5   | 15   | 12   | 25   | 596 | 68.4 |
| E   | 4   | 13   | 12   | 20   | 353 | 516  |

775

All: 160 samples; Sbf1/Msp1; 450-600 bp.  
 A: 20 samples; Sbf1/Msp1; 450-600 bp.  
 B: 20 samples; Sbf1/Msp1; 450-600 bp.  
 C: 20 samples; Sbf1/Msp1; 400-700 bp.  
 D: 20 samples; Sbf1/EcoRI; 450-600 bp.  
 E: 20 samples; Sbf1/EcoRI; 450-600 bp.

776

777 Table 4: Summary information for ddRAD-seq studies performed to investigate  
 778 parentage in other bird species.

| Species                      | Scientific name               | Number of individuals | Number of loci | Number of loci in HWE |
|------------------------------|-------------------------------|-----------------------|----------------|-----------------------|
| Variegated fairy-wren        | <i>Malurus lamberti</i>       | 160                   | 552            | 411                   |
| Hispaniolan woodpecker*      | <i>Melanerpes striatus</i>    | 288                   | 179            | 135                   |
| Northern Red-billed hornbill | <i>Tockus erythrorhynchus</i> | 40                    | 475            | 414                   |
| Von der Decken's hornbill    | <i>Tockus deckeni</i>         | 112                   | 490            | 410                   |
| Sapayoa                      | <i>Sapayoa aenigma</i>        | 6                     | 672            | 671                   |
| Red-backed fairy-wren**      | <i>Malurus melanocephalus</i> | 240                   | 483            | 233                   |
|                              |                               | 240                   | 291            | 174                   |

779 \* Two independent ddRAD-seq experiments were performed - one with 240 samples  
 780 and the other with 48. After quality filtering and demultiplexing the data from 288  
 781 samples was combined for denovo assembly and SNP identification.

782 \*\* Two independent ddRAD-seq experiments were run on each set of 240 samples.  
 783 There is 74% overlap in the loci identified in each experiment (of the loci in HWE).

784

785

786 **Figures**

787 Figure 1. Resolved paternity assignments for 5 nestlings with ambiguous assignments  
788 under the microsatellite panel, but not with the SNP panel. Each panel in the graph  
789 represents an individual offspring, and the two top-ranked males are depicted as a  
790 triangle and a circle, respectively. Lines connecting like shapes show the change in LOD  
791 score for each male, using each marker type (microsatellites versus SNPs). Note that y-  
792 axis scale varies among panels in the graph.

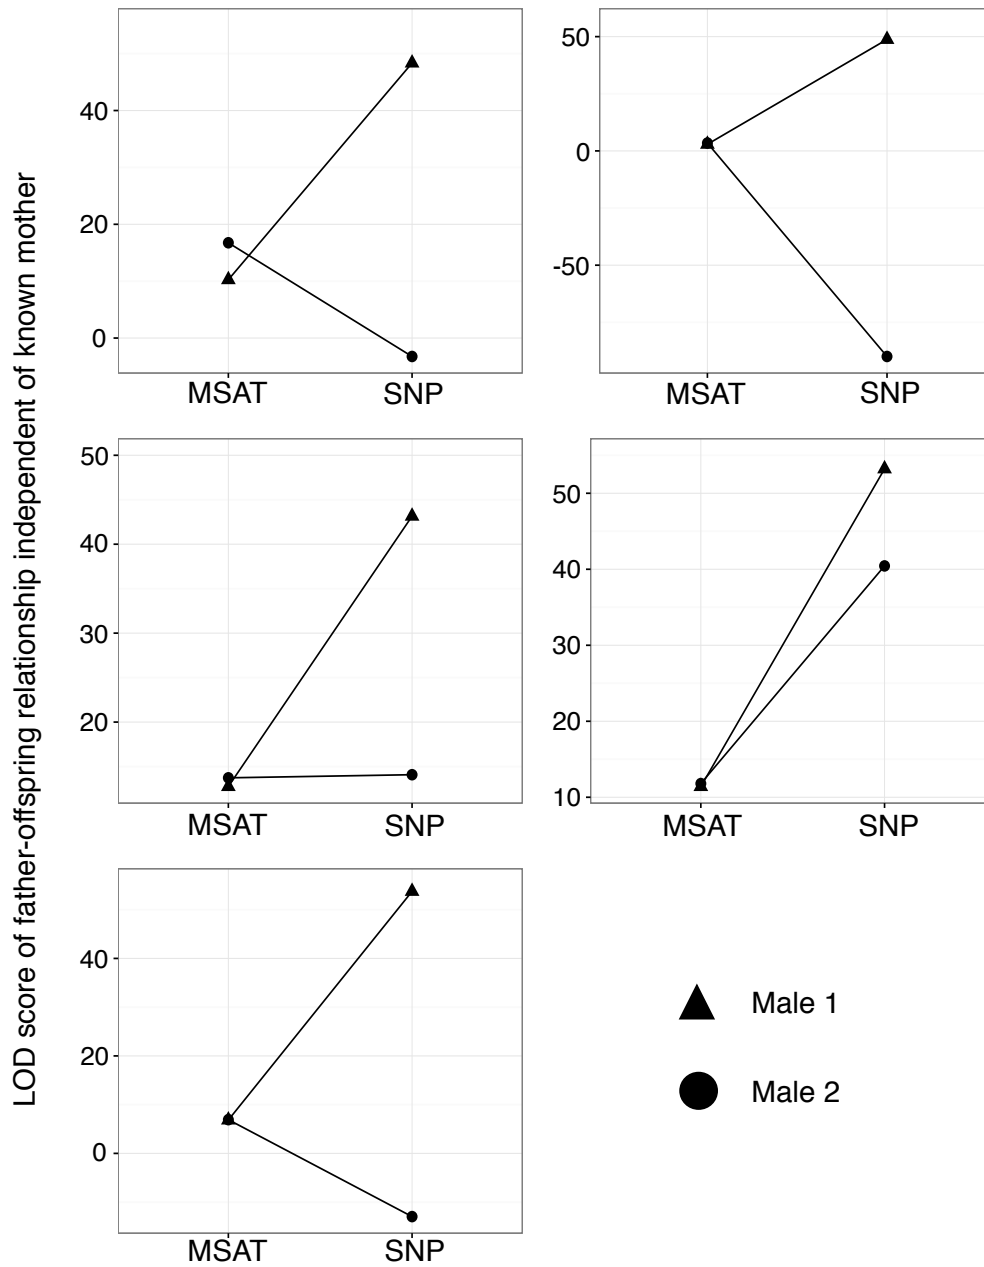

794 Figure 2. Difference in CERVUS LOD scores (delta LOD) between the most likely father  
795 of a nestling and the second possible father in the population, for both marker panels.

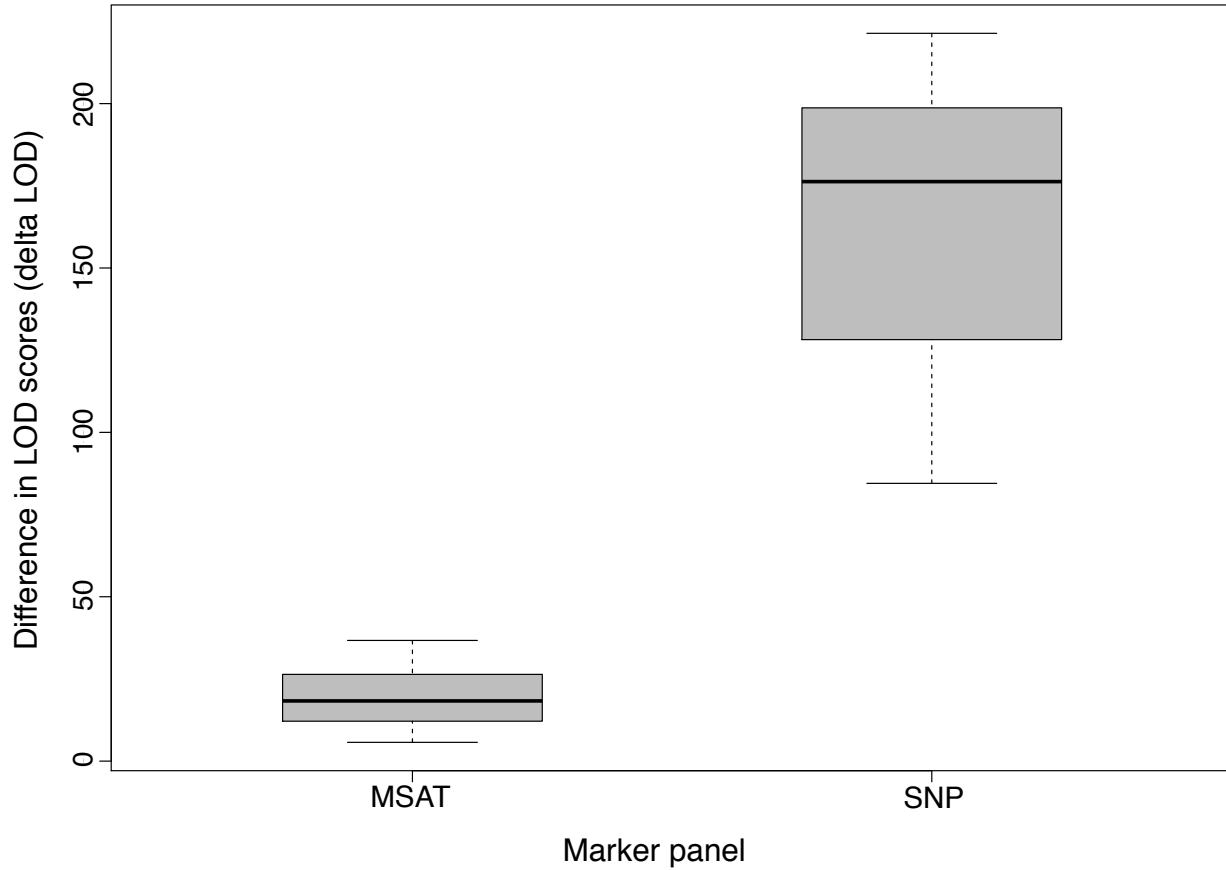

796  
797  
798  
799  
800  
801  
802  
803  
804  
805  
806  
807  
808  
809  
810  
811  
812



813 Figure 3. Box plot of pairwise relatedness values for all parent-offspring (40 mother-  
814 offspring and 40 father-offspring) relationships, using population allele frequencies from  
815 each marker panel.  
816

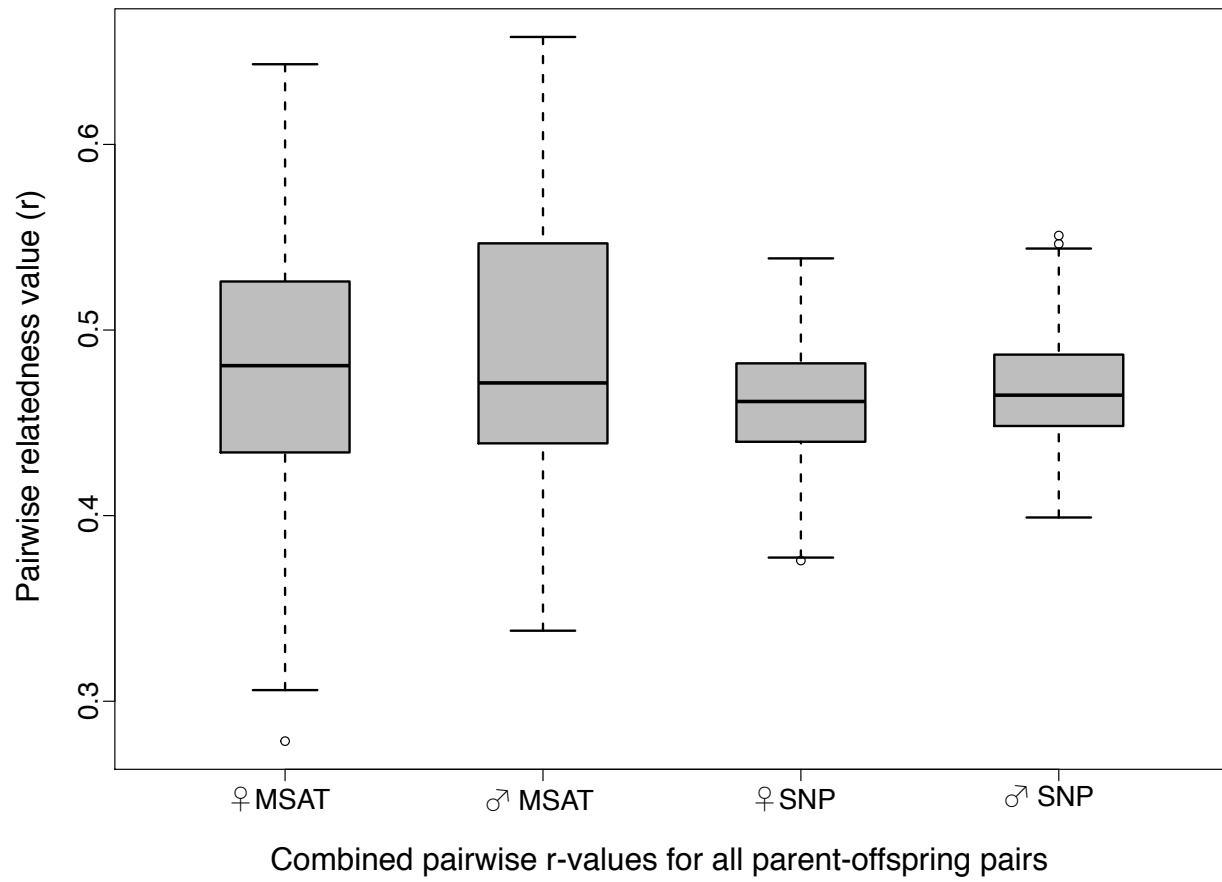

817  
818  
819  
820  
821  
822  
823  
824  
825  
826  
827  
828  
829  
830  
831

832 Figure 4. Density plots of relatedness values for simulated pairs of known relatedness  
833 (unrelated, half-sibling, full-sibling, and parent-offspring) using population allele  
834 frequencies from each marker panel (a. MSAT; b. SNP). Overlap in distributions  
835 indicates the overlap between relatedness value estimators for pairs of individuals of  
836 different relationships. The spread of each distribution indicates the reliability of  
837 observed relatedness values based on their deviation from expected relatedness values  
838 (Unrelated = 0, Half-sib = 0.25, Full-sib = 0.5, and Parent-offspring (P-O) = 0.5, denoted  
839 by vertical dashed lines).  
840

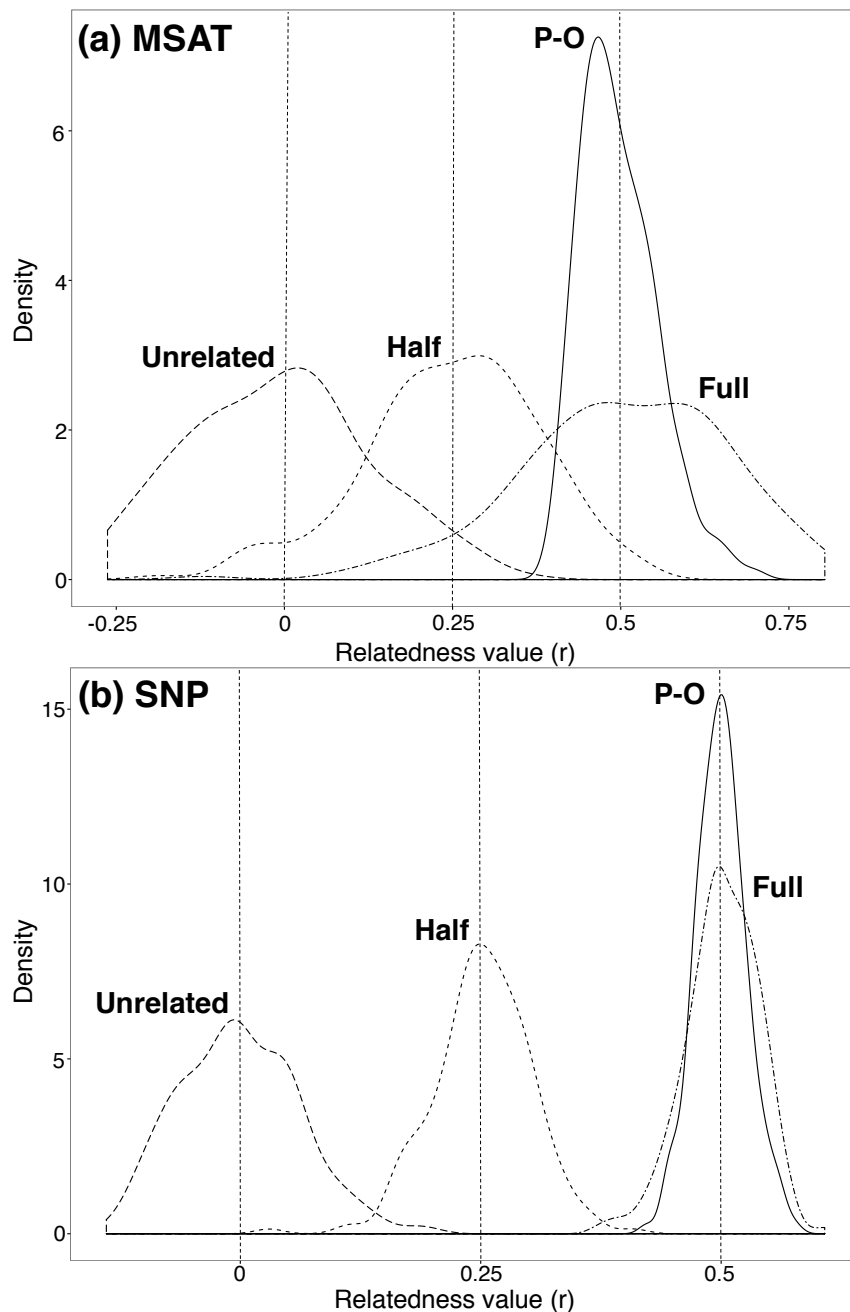

841
